# Supplementary material for: On the mechanism of catalytic hydrogenation of thiophene on hydrogen tungsten bronze
Source: Royal Society of Chemistry journal article supplement (doi:10.1039/c4cp05298f), 2015-01-01
Supplement: c4cp05298f1.pdf [file c4cp05298f1.pdf]

## Electronic Supplementary Information

### On the Mechanism of Catalytic Hydrogenation of Thiophene on Hydrogen Tungsten Bronze

*Yongjie Xi<sup>a</sup>, Zhangxian Chen<sup>a</sup>, Vincent Gan Wei Kiat<sup>a</sup>, Liang Huang<sup>a, b</sup>, Hansong Cheng<sup>\*, a, b</sup>*

*AUTHOR ADDRESS:*

*<sup>a</sup> Department of Chemistry, National University of Singapore, 3 Science Drive 3, Singapore 117543*

*<sup>b</sup> Sustainable Energy Laboratory, Faculty of Material Science and Chemistry, China University of Geosciences, Wuhan 430074, China*

Table S1

Transition state configuration and imaginary vibrational frequency for each reaction step

|           | Reaction step  | TS configuration                                                                     | TS vibrational frequency |
|-----------|----------------|--------------------------------------------------------------------------------------|--------------------------|
| Figure 4a | $R_{(1-2)h}^s$ | 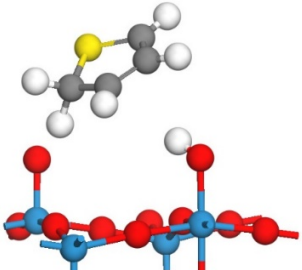   | 273.1i                   |
|           | $R_{(2-1)h}^s$ |    | 384.3i                   |
|           | $R_{(1,2)h}^c$ |   | 1149.6i                  |
|           | $R_{(1-2)v}^s$ |  | 289.6i                   |
|           | $R_{(2-1)v}^s$ |  | 898.6i                   |

|           |                           |                                                                                      |         |
|-----------|---------------------------|--------------------------------------------------------------------------------------|---------|
|           | $R_{(1,2)v}^c$            | 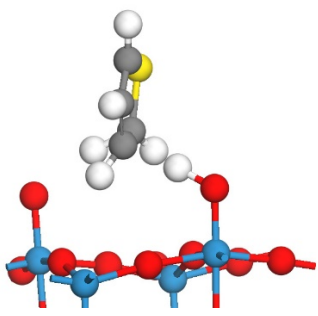   | 992.3i  |
| Figure 4b | $R_{(1-4)h}^s$            |    | 989.1i  |
|           | $R_{(1,4)h}^c$            |   | 576.8i  |
| Figure 5a | $R_{(3-4)}^s(\text{TS1})$ |  | 76.3i   |
|           | $R_{(3-4)}^s(\text{TS2})$ |  | 1584.5i |
|           | $R_{(3,4)}^c$             |  | 389.9i  |

|           |                             |                                                                                      |         |
|-----------|-----------------------------|--------------------------------------------------------------------------------------|---------|
|           | $R_{(4-3)}^s(\text{TS1})$   | 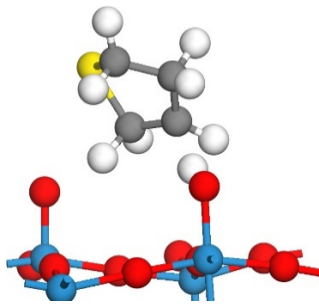   | 488.1i  |
|           | $R_{(4-3)}^s(\text{TS2})$   |    | 76.6i   |
| Figure 5b | $R_{(2-3)}^s(\text{TS1})$   |   | 1743.1i |
|           | $R_{(2-3)}^s(\text{TS2})$   |  | 99.6i   |
|           | $R_{(2,3)}^c$               |  | 335.2i  |
| Figure 7  | S–C bond scission of 12-DTP |  | 682.5i  |

|  |                          |                                                                                    |        |
|--|--------------------------|------------------------------------------------------------------------------------|--------|
|  | S-C bond scission of TTP | 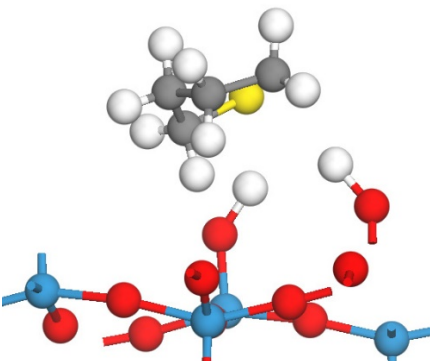 | 252.1i |
|--|--------------------------|------------------------------------------------------------------------------------|--------|
